# Supplementary material for: The Roles of AGTRAP, ALKBH3, DIVERSIN, NEDD8 and RRM1 in Glioblastoma Pathophysiology and Prognosis
Source: MDPI journal article supplement (doi:10.3390/biomedicines12040926), 2024-04-22
Supplement: s1 [file s1]

### NEDD8n expression

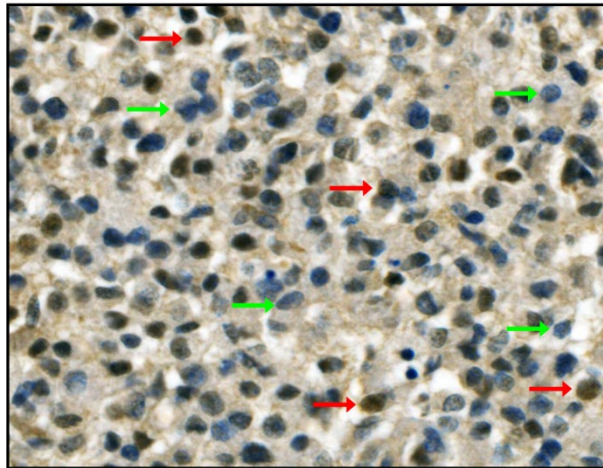

**Supplementary Figure S1. NEDD8n expression in GBM tissues.** High magnification micrograph showing NEDD8n positive (red arrows) and negative (green arrows) tumor cells.

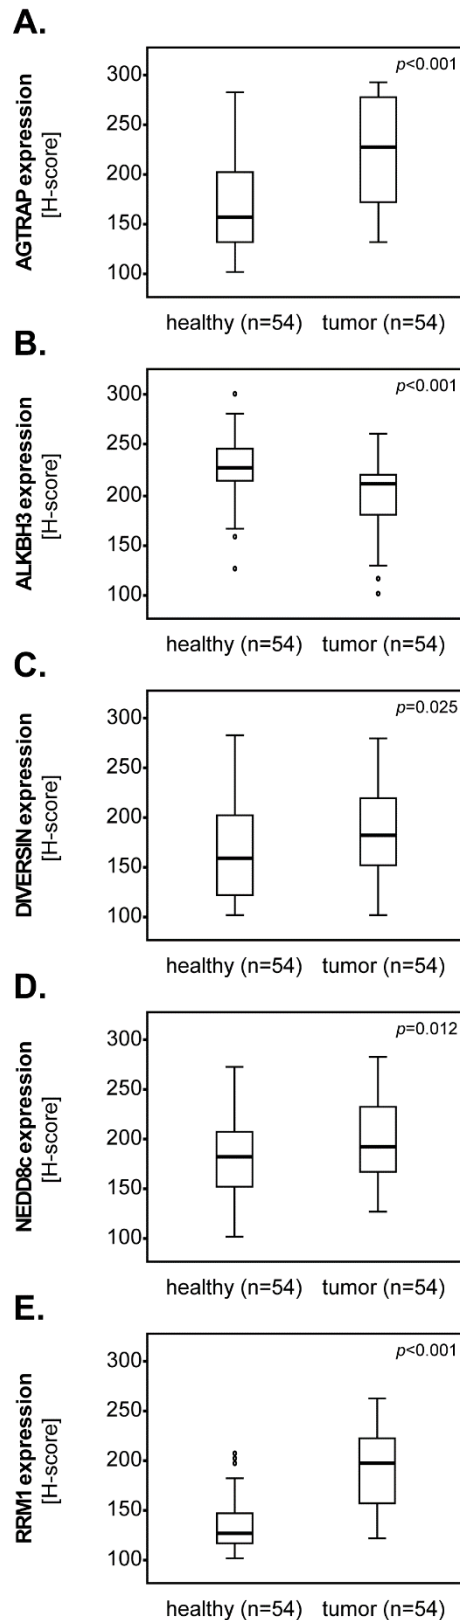

**Supplementary Figure S2. Marker expression in healthy versus GBM tissues (n=54).** Expression of (A) AGTRAP, (B) ALKBH3, (C) DIVERSIN, (D) NEDD8c and (E) RRM1 only in the 54 patients where both tumor and non-malign brain tissues were available. The medians are shown as black lines and the percentiles (25<sup>th</sup> and 75<sup>th</sup>) as vertical boxes with error bars. Statistical analysis was performed with the Mann-Whitney U test and the *p*-values are indicated in the upper-right corner of each plot.
